# Supplementary material for: Single-Cell RNA Sequencing Characterizes the Molecular Heterogeneity of the Larval Zebrafish Optic Tectum
Source: Front Mol Neurosci. 2022 Feb 10;15:818007. doi: 10.3389/fnmol.2022.818007 (PMC8869500; doi:10.3389/fnmol.2022.818007)
Supplement: Supplementary Table 8 — SFARI category 1–2 ASD genes and reviewed UniProt transcription factors, related to Figures 5, 6, and methods. [file Table_8.XLSX]

## Sheet: Sheet1
Category 1 SFARI ASD Genes (114) *no zebrafish ortholog	Category 2 SFARI ASD Genes (202) *no zebrafish ortholog	All Zebrafish ASD Orthologs (407)	Present Zebrafish ASD Orthologs (348)	All Reviewed Transcription Factors (310)	Present Reviewed Transcription Factors (257)
AFF2	ACHE	ache	ache	alx1	alx1
ANK2	ADA	ada	ada	arid3a	arid3a
ANK3	ADCY3	adcy3a	adcy3a	arid5b	arid5b
ASH1L	AGAP2	adcy3b	adcy3b	arnt2	arnt2
ATRX	AGO1	adnpb	adnpb	arxa	arxa
AUTS2	AGO2	aff2	aff2	ascl1a	ascl1a
AP2S1	AGO4	agap2	agap2	ascl1b	ascl1b
BAZ2B	AHNAK	ago1	ago1	atf4a	atf4a
BCKDK	AKAP9	ago4	ago4	atf7ip	atf7ip
BRSK2	AMPD1	ahnak	ahnak	atoh7	atoh7
CACNA1E	AMT	akap9	akap9	atoh8	atoh8
CACNA2D3	ANXA1	ampd1	ampd1	barx1	barx1
CAPRIN1	APBB1	amt	amt	batf	baz1b
CASK	APH1A*	ank2a	ank2a	baz1b	brf2
CASZ1	ASAP2	ank2b	ank2b	bhlha9	bsx
CELF4	ASPM	ank3a	ank3a	brf2	btf3l4
CHAMP1*	ASTN2	ank3b	ank3b	bsx	ccdc59
CREBBP	ATP10A	anxa1a	anxa1a	btf3l4	cep290
CSDE1	ATP2B2	anxa1b	anxa1b	ccdc59	chuk
CTCF	AVPR1A	ap2s1	ap2s1	cep290	churc1
CTNNB1	BICRA	apbb1	apbb1	chuk	cops5
CUL3	BTAF1	asap2a	asap2a	churc1	creb3l2
CORO1A	CACNA1D	asap2b	asap2b	cops5	creb3l3b
DIP2A	CACNA1H	ash1l	ash1l	creb3l2	crebl2
DLG4	CACNB2	aspm	aspm	creb3l3a	dbx1a
DPYSL2	CC2D1A	astn2	astn2	creb3l3b	dbx1b
DSCAM	CCNG1	atp10a	atp10a	crebl2	dlx1a
DYNC1H1	CCT4	atp2b2	atp2b2	dbx1a	dlx2a
EIF3G	CDC42BPB	atrx	atrx	dbx1b	dlx2b
ELAVL3	CDH13	auts2a	auts2a	dlx1a	dlx3b
FOXP2	CEP135	auts2b	auts2b	dlx2a	dlx4a
GABRB3	CEP41	avpr1aa	avpr1aa	dlx2b	dlx4b
GABRB2	CGNL1	avpr1ab	avpr1ab	dlx3b	dlx5a
GIGYF1	CHMP1A	baz2ba	baz2ba	dlx4a	dlx6a
GIGYF2	CHRNA7	baz2bb	baz2bb	dlx4b	dmbx1a
GRIA2	CIB2	bckdk	bckdk	dlx5a	dmbx1b
GFAP	CLASP1	bicra	bicra	dlx6a	dmrt1
GNAI1	CNOT1	brsk2a	brsk2a	dmbx1a	dmrt3a
GRIN2B	CNR1	brsk2b	brsk2b	dmbx1b	dmrta2
HDLBP	CNTN4	btaf1	btaf1	dmrt1	dmtf1
HECTD4	CNTN5	cacna1da	cacna1da	dmrt3a	e2f7
HIVEP2	CNTN6	cacna1db	cacna1db	dmrt3b	e2f8
HNRNPH2*	CNTNAP3	cacna1ea	cacna1ea	dmrta2	e4f1
HRAS	CNTNAP4	cacna1eb	cacna1eb	dmtf1	ebf2
KANSL1	CPEB4	cacna1ha	cacna1ha	drl	egr1
KATNAL2	CTNND2	cacna1hb	cacna1hb	e2f7	egr2b
KCNQ3	CTTNBP2	cacna2d3	cacna2d3	e2f8	en1a
KDM3B	CUL7*	cacna2d3a	cacna2d3a	e4f1	en2a
KDM5B	CUX1	cacnb2a	cacnb2a	ebf1a	en2b
KDM5C	CYFIP1	cacnb2b	cacnb2b	ebf2	eny2
KDM6B	DAPP1	caprin1a	caprin1a	egr1	ercc3
KIAA0232	DCC	caprin1b	caprin1b	egr2b	esr1
KMT2E	DDHD2	caska	caska	en1a	etv4
KMT5B	DENR	caskb	caskb	en2a	fezf2
LZTR1	DIP2C	casz1	casz1	en2b	foxa2
LDB1	DISC1	cc2d1a	cc2d1a	eny2	foxc1a
LRRC4C	DLG2	ccng1	ccng1	ercc3	foxc1b
MKX	DLGAP1	cct4	cct4	esr1	foxf1
MAP1A	DLX3	cdc42bpb	cdc42bpb	etv4	foxj1a
MYT1L	DOCK8	cdh13	cdh13	fev	foxj1b
NCKAP1	DPP10	celf4	celf4	fezf2	foxn4
MSL3*	EFR3A	cep135	cep135	foxa2	foxo1a
NCOA1	ELP4	cep41	cep41	foxc1a	foxo1b
NLGN2	EMSY	cgnl1	cgnl1	foxc1b	foxp1b
NLGN3	EP400	chmp1a	chmp1a	foxf1	gata3
NLGN4X	ERBIN	chrna7a	chrna7a	foxh1	gsc
NR3C2	ETFB	chrna7b	chrna7b	foxj1a	hand2
NR4A2	FBN1	cib2	cib2	foxj1b	helt
NRXN1	FGFR1	clasp1a	clasp1a	foxn4	helz
NRXN2	FRG1	clasp1b	clasp1b	foxo1a	hmx3a
NRXN3	GABRG3	cnot1	cnot1	foxo1b	hoxa10b
NUP155	GALNT10	cnr1	cnr1	foxp1b	hoxa11b
PAH	GALNT8	cntn4	cntn4	gata3	hoxa13b
PAX5	GGNBP2	cntn5	cntn5	gsc	hoxa1a
PHF2	GPC4	cntn6	cntn6	hand2	hoxa2b
PHF3	GPHN	cntnap3	cntnap3	helt	hoxa4a
PHF12	GRIA1	cntnap4	cntnap4	helz	hoxa9b
PTCHD1	GRID1	coro1a	coro1a	hmx3a	hoxb1b
PTK7	GRIK2	cpeb4a	cpeb4a	hmx3b	hoxb2a
PPP1R9B	GRIK5	cpeb4b	cpeb4b	hnf1ba	hoxb3a
PPP5C	GRIN1	crebbpa	crebbpa	hnf1bb	hoxb5a
RELN	GRIN2A	crebbpb	crebbpb	hoxa10b	hoxb5b
RFX3	GRIP1	csde1	csde1	hoxa11a	hoxb6a
RIMS1	HECW2	ctcf	ctcf	hoxa11b	hoxb8a
RORB	HIVEP3	ctnnb1	ctnnb1	hoxa13a	hoxc13b
SATB1	HMGN1*	ctnnd2a	ctnnd2a	hoxa13b	hoxc1a
SCN2A*	HNRNPF*	cttnbp2	cttnbp2	hoxa1a	hoxc3a
SCN8A	ICA1	cul3a	cul3a	hoxa2b	hoxc5a
SETBP1	ILF2	cul3b	cul3b	hoxa3a	hoxd3a
SETD2	INTS6	cux1a	cux1a	hoxa4a	hoxd4a
SHANK2	ITGB3	cux1b	cux1b	hoxa5a	ier2a
SKI	JARID2	cyfip1	cyfip1	hoxa9a	ier2b
SMARCA4	KAT2B	dapp1	dapp1	hoxa9b	ikzf5
SON	KCNJ10	dcc	dcc	hoxb10a	inka1a
SPAST	KCNQ2	ddhd2a	ddhd2a	hoxb13a	insm1a
SRCAP	KCNS3	ddhd2b	ddhd2b	hoxb1a	insm1b
SYN1	KDM4C	denr	denr	hoxb1b	isl1
SRPRA	KDM5A	dip2a	dip2a	hoxb2a	isl2a
TANC2	KDM6A	dip2ca	dip2ca	hoxb3a	isl2b
TAOK1	KIAA1586*	dip2cb	dip2cb	hoxb4a	jdp2a
TBCK	KIF14	disc1	disc1	hoxb5a	jdp2b
TBL1XR1	KIRREL3	dlg2	dlg2	hoxb5b	kctd15a
TBR1	LAMB1	dlg4a	dlg4a	hoxb6a	keap1a
TCF7L2	LEO1	dlg4b	dlg4b	hoxb6b	keap1b
TEK	LMX1B	dlgap1a	dlgap1a	hoxb7a	ldb1a
TM9SF4	LRP1	dlgap1b	dlgap1b	hoxb8a	lhx1a
TRIO	MACROD2	dlx3b	dlx3b	hoxb8b	lhx5
TSHZ3	MAPT-AS1*	dock8	dock8	hoxb9a	lhx9
TRIM23	MET	dpp10	dpp10	hoxc11a	lmo2
VEZF1	MFRP	dpysl2a	dpysl2a	hoxc12b	loxl2a
WDFY3	MIR137	dpysl2b	dpysl2b	hoxc13a	loxl2b
UBR1	MSNP1AS*	dscama	dscama	hoxc13b	maea
ZNF292	MYH10	dscamb	dscamb	hoxc1a	mafaa
ZMYND8	MYH9	dync1h1	dync1h1	hoxc3a	mafb
	MYO5A	efr3a	efr3a	hoxc4a	max
	MYO9B	eif3g	eif3g	hoxc5a	med12
	NAV2	elavl3	elavl3	hoxc6a	med19a
	NCOR1	elp4	elp4	hoxc6b	med19b
	NEXMIF	emsy	emsy	hoxc8a	meox1
	NFE2L3	ep400	ep400	hoxc9a	mindy1
	NINL	erbin	erbin	hoxd10a	mllt11
	NLGN1	etfb	etfb	hoxd11a	msx1b
	NUAK1	fbn1	fbn1	hoxd12a	msx2a
	NUDCD2	fgfr1a	fgfr1a	hoxd13a	msx2b
	OPHN1	fgfr1b	fgfr1b	hoxd3a	msx3
	OR52M1*	foxp2	foxp2	hoxd4a	mtpn
	OTUD7A	frg1	frg1	hoxd9a	mybbp1a
	OXTR	gabrb2a	gabrb2a	ier2a	myca
	P2RX5	gabrb2b	gabrb2b	ier2b	mycb
	P4HA2	gabrb3	gabrb3	ikzf5	mycn
	PAK2	gabrg3	gabrg3	inka1a	myod1
	PARD3B	galnt10	galnt10	insm1a	neurog1
	PER2	galnt8a.1	galnt8a.1	insm1b	nfil3
	PHB	galnt8a.2	galnt8a.2	isl1	nipbla
	PHF7*	galnt8b.1	galnt8b.1	isl2a	nipblb
	PHRF1	galnt8b.2	galnt8b.2	isl2b	nkx2.2a
	PLCB1	gfap	gfap	jdp2a	npas4a
	PLXNA4	ggnbp2	ggnbp2	jdp2b	npas4l
	PLXNB1	gigyf1a	gigyf1a	jmy	nr2f1a
	PON1	gigyf1b	gigyf1b	kctd15a	nr2f1b
	PREX1	gigyf2	gigyf2	kctd15b	nr2f5
	PRICKLE1	gnai1	gnai1	keap1a	nrarpa
	PRICKLE2	gpc4	gpc4	keap1b	nrarpb
	PRKCB	gphna	gphna	ldb1a	nrf1
	PRKD2	gria1a	gria1a	lhx1a	otpb
	PRKN	gria2a	gria2a	lhx3	otx1
	PTCHD1-AS*	gria2b	gria2b	lhx5	otx2a
	PYHIN1*	grid1a	grid1a	lhx9	otx2b
	QRICH1	grik2	grik2	lmo2	pax2a
	RAB2A	grik5	grik5	loxl2a	pax6a
	RAB43	grin1a	grin1a	loxl2b	pcgf5a
	RALGAPB	grin1b	grin1b	maea	pcgf5b
	RANBP17*	grin2aa	grin2aa	mafa	pias4a
	RBFOX1	grin2ab	grin2ab	mafaa	pitx2
	RBM27	grin2ba	grin2ba	mafb	pitx3
	ROBO2	grin2bb	grin2bb	max	pou3f1
	RPS10P2-AS1*	grip1	grip1	med12	pou3f2a
	SAE1	hdlbpa	hdlbpa	med19a	pou3f2b
	SBF1	hdlbpb	hdlbpb	med19b	pou3f3a
	SCAF4	hectd4	hectd4	meox1	pou3f3b
	SCN9A*	hecw2a	hecw2a	mindy1	pou4f3
	SEMA5A	hecw2b	hecw2b	mllt11	pou6f1
	SET	hivep2a	hivep2a	msx1b	ppdpfa
	SHANK1	hivep2b	hivep2b	msx2a	ptf1a
	SHOX	hivep3a	hivep3a	msx2b	raraa
	SLC12A5	hivep3b	hivep3b	msx3	rarab
	SLC35B1	hrasa	hrasa	mtpn	rarga
	SLC38A10	hrasb	hrasb	mybbp1a	rargb
	SLC6A3	ica1	ica1	myca	rcor2
	SLC7A3	ilf2	ilf2	mycb	reep6
	SLC7A5	ints6	ints6	mycn	rest
	SLITRK5	itgb3a	itgb3a	myf6	rfx2
	SMAD4	itgb3b	itgb3b	myod1	rfx3
	SNX5	jarid2a	jarid2a	neurog1	rfx4
	SORCS3	jarid2b	jarid2b	nfil3	rps6kal
	SPARCL1	kansl1a	kansl1a	nipbla	rx1
	SPEN	kansl1b	kansl1b	nipblb	rx2
	SRSF11	kat2b	kat2b	nkx2.2a	rx3
	ST8SIA2	katnal2	katnal2	npas4a	rxraa
	STXBP5	kcnj10a	kcnj10a	npas4b	rxrab
	TAF6	kcnj10b	kcnj10b	npas4l	rxrba
	TAOK2	kcnq2a	kcnq2a	nr2f1a	rxrbb
	TBC1D31	kcnq2b	kcnq2b	nr2f1b	rxrgb
	TERF2*	kcnq3	kcnq3	nr2f5	setd6
	TET2	kcns3a	kcns3a	nr6a1a	sim1a
	TMLHE	kcns3b	kcns3b	nr6a1b	sirt2
	TNRC6B	kdm3b	kdm3b	nrarpa	six1a
	TRAPPC9	kdm4c	kdm4c	nrarpb	six1b
	TRPC6	kdm5a	kdm5a	nrf1	smad1
	TRPM1	kdm5ba	kdm5ba	otpb	smad2
	UBE3C	kdm5bb	kdm5bb	otx1	smad5
	UBN2	kdm5c	kdm5c	otx2a	sox14
	UBR5	kdm6a	kdm6a	otx2b	sox19a
	UNC79	kdm6ba	kdm6ba	pax2a	sox19b
	USP15	kdm6ba	kdm6ba	pax6a	sox1a
	USP45	kdm6bb	kdm6bb	pcgf5a	sox1b
	VIL1	kdm6bb	kdm6bb	pcgf5b	sox2
	WDFY4	kif14	kif14	pias4a	sox21a
	WWOX	kirrel3a	kirrel3a	pitx2	sox21b
	ZC3H4	kirrel3b	kirrel3b	pitx3	sox3
	ZMYND11	kmt2e	kmt2e	pnx	sp8b
	ZNF804A	kmt5b	kmt5b	pou3f1	sp9
		lamb1a	lamb1a	pou3f2a	spop
		lamb1b	lamb1b	pou3f2b	spopla
		ldb1a	ldb1a	pou3f3a	spoplb
		ldb1b	ldb1b	pou3f3b	srebf2
		leo1	leo1	pou4f3	taf1b
		lmx1ba	lmx1ba	pou5f3	taf2
		lmx1bb	lmx1bb	pou6f1	taf8
		lrp1aa	lrp1aa	ppdpfa	tal1
		lrp1ab	lrp1ab	ptf1a	tbp
		lrrc4ca	lrrc4ca	raraa	tbpl1
		lrrc4cb	lrrc4cb	rarab	tbx1
		lztr1	lztr1	rarga	tbx16l
		macrod2	macrod2	rargb	tbx20
		map1aa	map1aa	rcor2	tbx2b
		map1ab	map1ab	reep6	tbx5a
		met	met	rest	tbx6
		mfrp	mfrp	rfx2	tcf21
		mir137-1	mir137-1	rfx3	tcf7l1a
		mir137-2	mir137-2	rfx4	tcf7l1b
		mkxa	mkxa	rfx6	terf2ip
		mkxb	mkxb	rps6kal	tfap2d
		myh10	myh10	rwdd3	tfap2e
		myh9a	myh9a	rx1	thraa
		myh9b	myh9b	rx2	thrb
		myo5aa	myo5aa	rx3	tle3a
		myo5ab	myo5ab	rxraa	tle3b
		myo9b	myo9b	rxrab	tp53
		myt1la	myt1la	rxrba	tshz1
		myt1lb	myt1lb	rxrbb	ufl1
		nav2a	nav2a	rxrga	uncx
		nav2b	nav2b	rxrgb	vax1
		nckap1	nckap1	sebox	vax2
		ncoa1	ncoa1	setd6	vdra
		ncor1	ncor1	sim1a	vdrb
		nexmif1	nexmif1	sirt2	vps33b
		nexmifb	nexmifb	six1a	vsx1
		nfe2l3	nfe2l3	six1b	vsx2
		ninl	ninl	smad1	wdr11
		nlgn1	nlgn1	smad2	ybx1
		nlgn2a	nlgn2a	smad5	yjefn3
		nlgn2b	nlgn2b	sox14	zbtb16a
		nlgn3a	nlgn3a	sox19a	zbtb24
		nlgn3b	nlgn3b	sox19b	zfpm1
		nlgn4xa	nlgn4xa	sox1a	zgc:172182
		nlgn4xb	nlgn4xb	sox1b	zgpat
		nr3c2	nr3c2	sox2	znf143a
		nr4a2a	nr4a2a	sox21a	znf143b
		nr4a2b	nr4a2b	sox21b	znf148
		nrxn1a	nrxn1a	sox3	znf16l
		nrxn1b	nrxn1b	sp8b	znf423
		nrxn2a	nrxn2a	sp9	znf503
		nrxn2b	nrxn2b	spop	znf703
		nrxn3a	nrxn3a	spopla	znf704
		nrxn3b	nrxn3b	spoplb	znf711
		nuak1a	nuak1a	srebf2	znf750
		nuak1b	nuak1b	taf1b
		nudcd2	nudcd2	taf2
		nup155	nup155	taf8
		ophn1	ophn1	tal1
		otud7a	otud7a	tbp
		oxtra	oxtra	tbpl1
		oxtrb	oxtrb	tbpl2
		p2rx5	p2rx5	tbx1
		p4ha2	p4ha2	tbx16l
		pah	pah	tbx20
		pak2a	pak2a	tbx2b
		pak2b	pak2b	tbx5a
		pard3ba	pard3ba	tbx6
		pard3bb	pard3bb	tbxta
		pax5	pax5	tcf21
		per2	per2	tcf7l1a
		phb	phb	tcf7l1b
		phf12a	phf12a	terf2ip
		phf12b	phf12b	tfap2d
		phf2	phf2	tfap2e
		phf3	phf3	thraa
		phrf1	phrf1	thrb
		plcb1	plcb1	tle3a
		plxna4	plxna4	tle3b
		plxnb1a	plxnb1a	tp53
		plxnb1b	plxnb1b	tshz1
		pon1	pon1	ufl1
		ppp1r9ba	ppp1r9ba	uncx
		ppp1r9bb	ppp1r9bb	vax1
		ppp5c	ppp5c	vax2
		prex1	prex1	vdra
		prickle1a	prickle1a	vdrb
		prickle1b	prickle1b	vps33b
		prickle2a	prickle2a	vsx1
		prickle2b	prickle2b	vsx2
		prkcba	prkcba	wdr11
		prkcbb	prkcbb	ybx1
		prkd2	prkd2	yjefn3
		prkn	prkn	zbtb16a
		ptk7a	ptk7a	zbtb24
		ptk7b	ptk7b	zfpm1
		qrich1	qrich1	zgc:172182
		rab2a	rab2a	zgpat
		rab43	rab43	znf143a
		ralgapb	ralgapb	znf143b
		rbfox1	rbfox1	znf148
		rbm27	rbm27	znf16l
		reln	reln	znf423
		rfx3	rfx3	znf503
		rims1a	rims1a	znf703
		rims1b	rims1b	znf704
		robo2	robo2	znf711
		rorb	rorb	znf750
		sae1	sae1
		satb1a	satb1a
		satb1b	satb1b
		sbf1	sbf1
		scaf4a	scaf4a
		scaf4b	scaf4b
		scn8aa	scn8aa
		scn8ab	scn8ab
		sema5a	sema5a
		seta	seta
		setb	setb
		setbp1	setbp1
		setd2	setd2
		shank1	shank1
		shank2a	shank2a
		shank2b	shank2b
		shox	shox
		skia	skia
		skib	skib
		slc12a5a	slc12a5a
		slc12a5b	slc12a5b
		slc35b1	slc35b1
		slc38a10	slc38a10
		slc6a3	slc6a3
		slc7a3a	slc7a3a
		slc7a3b	slc7a3b
		slc7a5	slc7a5
		slitrk5a	slitrk5a
		slitrk5b	slitrk5b
		smad4a	smad4a
		smad4b	smad4b
		smarca4a	smarca4a
		smarca4b	smarca4b
		snx5	snx5
		sona	sona
		sonb	sonb
		sorcs3a	sorcs3a
		sorcs3b	sorcs3b
		sparcl1	sparcl1
		spast	spast
		spen	spen
		srcap	srcap
		srpra	srpra
		srsf11	srsf11
		st8sia2	st8sia2
		stxbp5a	stxbp1a
		stxbp5b	stxbp1b
		syngap1a	syngap1a
		syngap1b	syngap1b
		taf6	taf6
		tanc2a	tanc2a
		tanc2b	tanc2b
		taok1a	taok1a
		taok1b	taok1b
		tbc1d31	tbc1d31
		tbck	tbck
		tbl1xr1a	tbl1xr1a
		tbl1xr1b	tbl1xr1b
		tbr1a	tbr1a
		tbr1b	tbr1b
		tcf7l2	tcf7l2
		tek	tek
		tet2	tet2
		tm9sf4	tm9sf4
		tmlhe	tmlhe
		tnrc6b	tnrc6b
		trappc9	trappc9
		trim23	trim23
		trioa	trioa
		triob	triob
		trpc6a	trpc6a
		trpc6b	trpc6b
		trpm1a	trpm1a
		trpm1b	trpm1b
		tshz3a	tshz3a
		tshz3b	tshz3b
		ube3c	ube3c
		ubn2a	ubn2a
		ubn2b	ubn2b
		ubr1	ubr1
		ubr5	ubr5
		unc79	unc79
		usp15	usp15
		usp45	usp45
		vezf1a	vezf1a
		vezf1b	vezf1b
		vil1	vil1
		wdfy3	wdfy3
		wdfy4	wdfy4
		wwox	wwox
		zc3h4	zc3h4
		zgc:158564	zgc:158564
		zmynd11	zmynd11
		zmynd8	zmynd8
		znf292a	znf292a
		znf292b	znf292b
		znf804a	znf804a
